# Supplementary material
Source: PubMed Central journal article supplement (PMC4487778)
Supplement: NIHMS697730-supplement-1.pdf [file NIHMS697730-supplement-1.pdf]

| <b>viruses</b>              | <b>relative receptor binding avidity</b> |
|-----------------------------|------------------------------------------|
| A/Texas/50/2012-WT          | ++                                       |
| A/Texas/50/2012-N128A       | ++                                       |
| A/Texas/50/2012-A138S       | +++                                      |
| A/Texas/50/2012-R142G       | ++                                       |
| A/Texas/50/2012-N144S+N145S | ++                                       |
| A/Texas/50/2012-N145S       | +++                                      |
| A/Texas/50/2012-F159S       | +                                        |
| A/Texas/50/2012-N225D       | +++                                      |
| A/Switzerland/9715293/2013  | +++                                      |

**Table S1: Mutant viral panel and receptor binding avidities, related to Table 2.**

Shown are the reverse genetics-derived mutant panel that we created for our antigenic analyses. Relative receptor binding avidity is also shown (+++ indicates virus was able to agglutinate red blood cells treated with > 1.0 ug/mL RDE; ++ indicates virus was able to agglutinate red blood cells treated with 0.5-1.0 ug/mL RDE; + indicates virus was able to agglutinate red blood cells treated with <0.5 ug/mL RDE). Data are representative of 2 independent experiments.

|                             | A/Texas/50/2012-WT | A/Texas/50/2012-F159S |
|-----------------------------|--------------------|-----------------------|
| human ID 06                 | 640                | 80                    |
| human ID 14                 | 1280               | 80                    |
| human ID 20                 | 640                | <40                   |
| human ID 21                 | 320                | 40                    |
| human ID 22                 | 640                | 160                   |
| human ID 23                 | 320                | 80                    |
| human ID 31                 | 320                | 80                    |
| ferret anti-A/Texas/50/2012 | 1280               | 40                    |

**Table S2: *In vitro* neutralization titers using sera isolated from vaccinated humans and infected ferrets, related to Table 2 and Table 3.** *In vitro* neutralization assays were completed using sera isolated 21 days following vaccination of humans with the 2014-2015 influenza vaccine or sera isolated 19 days following infection of ferrets with the A/Texas/50/2012 strain. Data are representative of 2 independent assays.
